# Supplementary material
Source: Springer Nature journal article supplement (https://www.springermedizin.de/resource/supplementary/12998_2011_58_MOESM21_ESM.pdf/9680054)

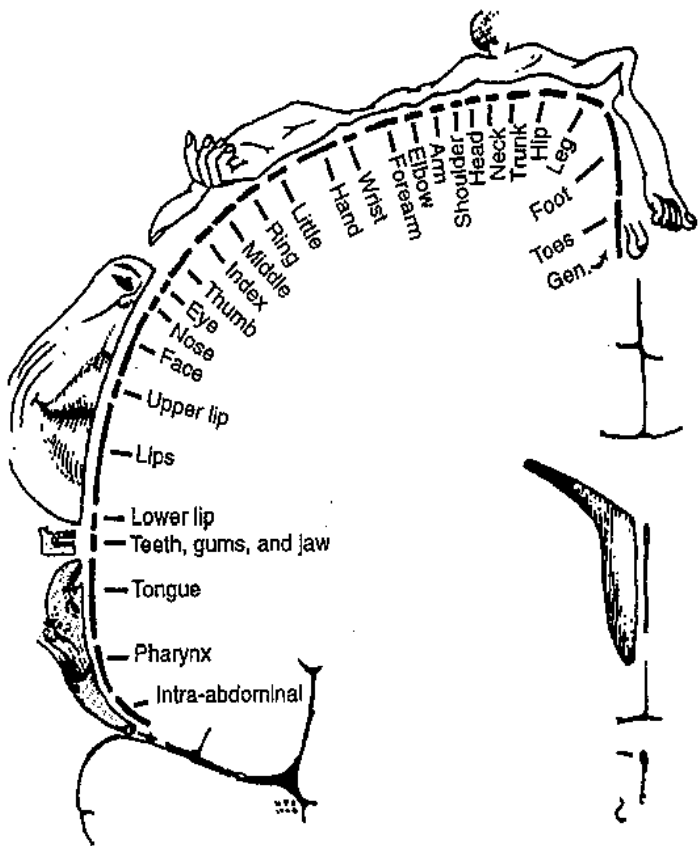

Supplement: MOESM21 [file 9680054]
